# Supplementary material for: Evaluating the Epithelial-Mesenchymal Program in Human Breast Epithelial Cells Cultured in Soft Agar Using a Novel Macromolecule Extraction Protocol
Source: MDPI journal article supplement (doi:10.3390/cancers13040807), 2021-02-15
Supplement: s1 [file s1]

Supplementary Materials

# Evaluating the Epithelial-Mesenchymal Program in Human Breast Epithelial Cells Cultured in Soft Agar Using a Novel Macromolecule Extraction Protocol

Hiu Yeung Lau , Jingyi Tang , Patrick J. Casey and Mei Wang

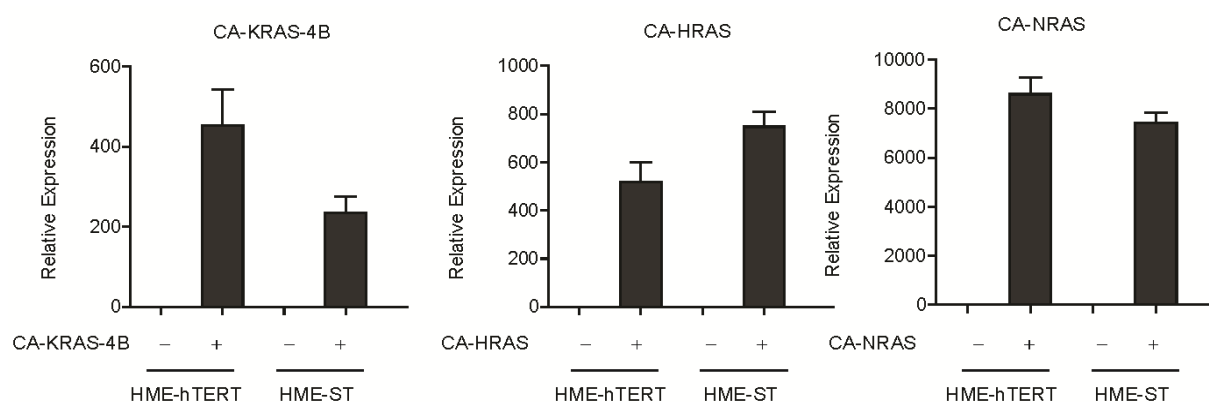

**Figure S1.** RT-PCR analysis performed on HME-hTERT and HME-ST cells expressing exogenous mutant isoforms of RAS (+) or empty vector control (-) using primers against exogenous KRAS-4B, NRAS and HRAS.

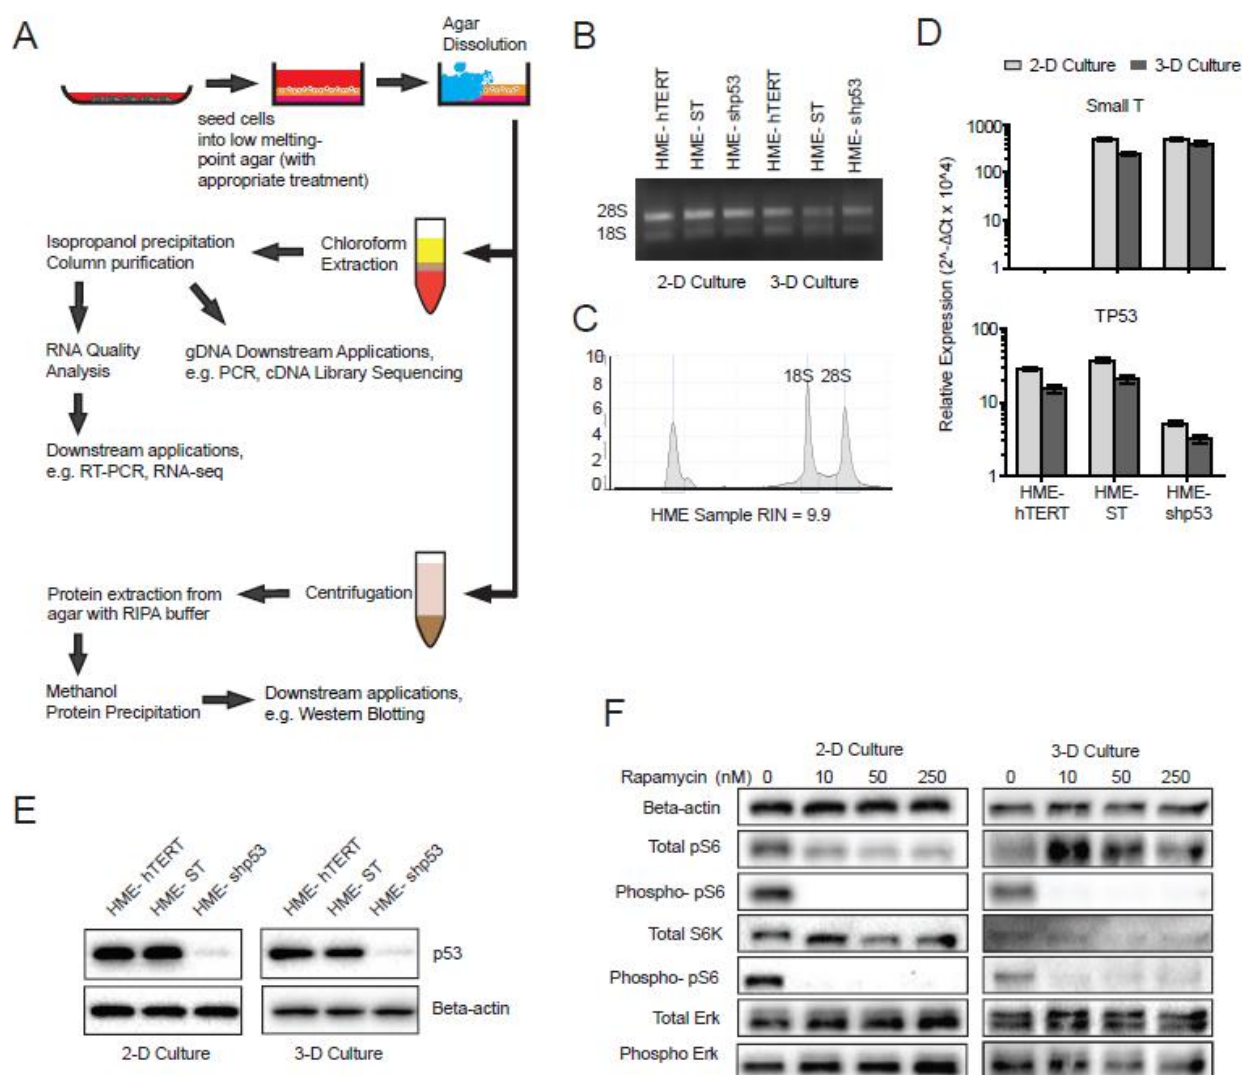

**Figure S2.** Detection of changes in DNA, RNA and protein levels using the samples extracted from cells cultured in soft agar using the new extraction protocol. **(A)** Illustration of the workflow for both the CTAC-based RNA and DNA extraction protocol and the chloroform-methanol based protein extraction protocol from cells grown in soft-agar. **(B)** Agarose-gel electrophoresis of RNAs extracted from the indicated cell lines demonstrating that the CTAC-based protocol is able to extract intact RNAs from soft-agar (3-D) (right side) with comparable quality to the RNA samples from cells in adherent culture (2-D) (left side). **(C)** RNA integrity analysis Agilent Technologies 2100 Bioanalyzer and the results reported as RNA Integrity Number (RIN). **(D)** RT-PCR analysis using RNA samples extracted from the indicated HME cells cultured under conventional adherent (2-D, grey bar) as well as in soft agar (3-D, dark grey bar) conditions. Both sets of RNA samples reliably reflect the expected expression of small T antigen and downregulation of p53 in HME-hTERT, HME-ST and HME-shp53 cells. **(E)** Immunoblot analysis for p53 expression in HME-hTERT, HME-ST and HME-shp53 cells using Beta-actin as loading control. **(F)** Immunoblot analysis of the indicated proteins and phosphoproteins extracted from MiaPaCa-2 cells grown under adherent (2-D) and soft agar (3-D) conditions after subjected to Rapamycin treatment at escalating concentrations; the protein samples from soft agar are extracted using the newly-developed protocol.

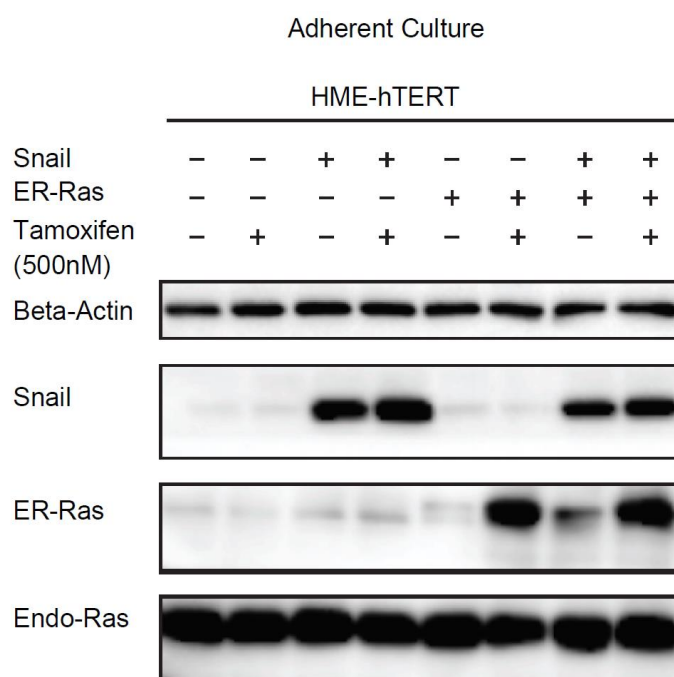

**Figure S3.** Western blot analysis performed using protein samples extracted from 2D adherent cultures of HME-hTERT and HME-ST, with or without introducing exogenous SNAIL1, in the presence or absence of tamoxifen induced CA-NRAS expression.

**Table S1.** Sequences of the primers used in q-RT-PCR.

| RT-PCR primer    | Forward                 | Reverse                |
|------------------|-------------------------|------------------------|
| SNAL1            | CCAGTGCCTCGACCACTATG    | CTGCTGGAAGGTAACTCTGG   |
| SNAL2(SLUG)      | CACTGCGATGCCAGTCTA      | TTCTCCCCCGTGTGAGTTCTAA |
| ZEB1             | AGTGGTCATGATGAAAATGGAAC | AGGTGTAAGTGCACAGGGAGC  |
| ZEB2             | CAACCATGAGTCCTCCCCAC    | GTCTTCCTTCATTCTCTGACC  |
| Occludin         | AAAGTCCACCTCCTTACAGGC   | GGCTGAGAGAGCATTGGTCG   |
| CDH2             | AGGCTTCTGGTGAAATCGCA    | TGCAGTTGCTAACTTCACATTG |
| CDH1             | GTCTGGGCAGAGTGAATTT     | GACCAAGAAATGGATCTGTGG  |
| CDKN1A           | CTGTGATGCGCTAATGGCG     | AAGTCGAAGTTCCATCGCTCA  |
| CyclinD1         | AACTACCTGGACCGCTTCCT    | CCACTTGAGCTTGTTACCA    |
| Fibronectin      | CTGGCCAGTCCTACAACCAG    | CGGGAATCTTCTGTGTCAGCC  |
| Vimentin         | CGAGGAGAGCAGGATTCTC     | GGTATCAACCAGAGGGAGTGA  |
| TP53             | ACCTATGGAACTACTTCCTGAAA | CTGGCATTCTGGGAGCTTCA   |
| Desmoplakin      | GGCACCAGCAGGATGTACTA    | GATGAGCTCTGCTCGCATCA   |
| shRNA sequence   | Targeting sequence      |                        |
| pLL3.7 shSNAI1_1 | GCCATGGAATTCCTCCTG      |                        |
| pLL3.7 shSNAI1_2 | GCCTAACTACAGCGAGCTG     |                        |
| pLL3.7 shCDH1_1  | GTGATGCAGTTAGTATAGC     |                        |
| pLL3.7 shCDH1_2  | GAACAGCACGTACACAGCC     |                        |
